# Supplementary material for: Picoeukaryotic sequences in the Sargasso Sea metagenome
Source: Springer Nature journal article supplement (doi:10.1186/gb-2008-9-1-r5), 2008-01-07

**SuppFig 1: Supertree of 28S rRNA, Consensus of 498000 trees.**

GenBank accession numbers in sequence name.

Numbers on branches give percent of topologies supporting a branch.

SSD : Sargasso Sea Database scaffold.

\*SSD : SSD scaffold for which topology enables to assign taxonomic affiliation (branch supported by 80% of topologies)

S6 : paired reads from sample 6 (see Method)

A : Anchor dataset sequence.

BBH : GenBank Best Blast Hit sequence.

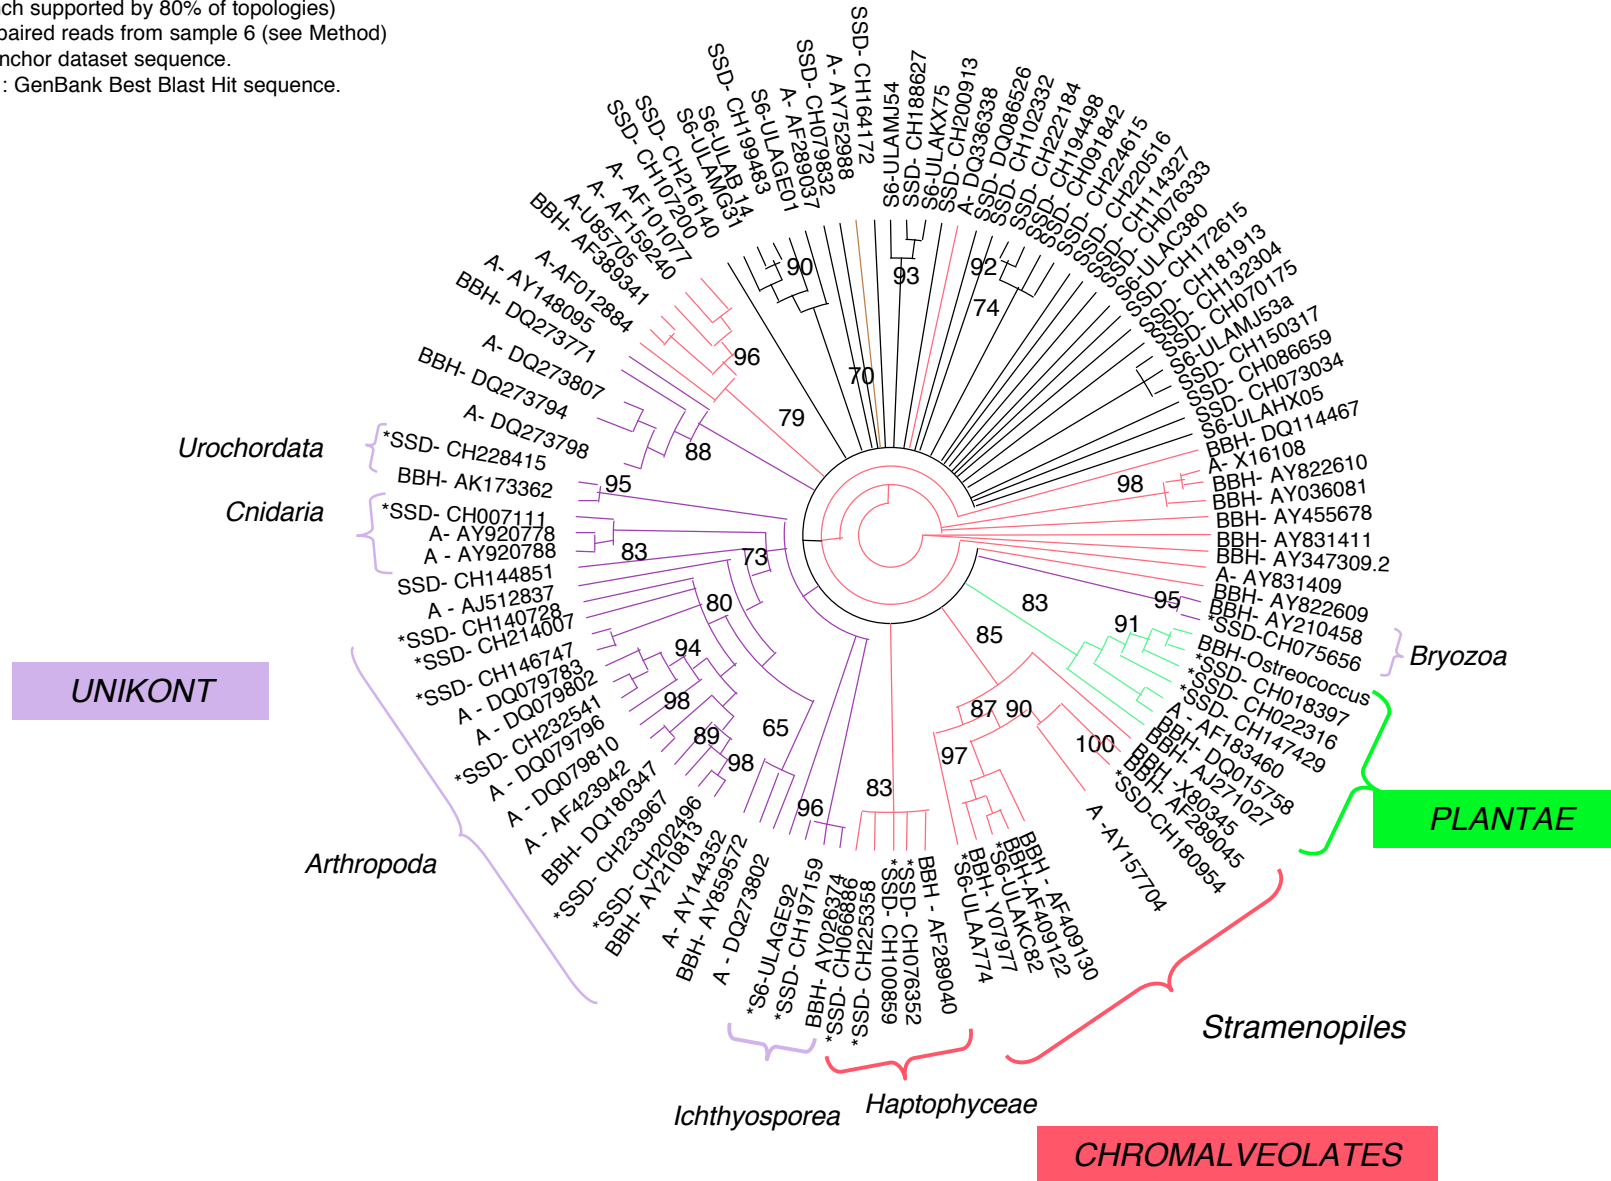

Supplement: Additional file 1 [file gb-2008-9-1-r5-s1.pdf]
