# Supplementary material for: Picoeukaryotic sequences in the Sargasso Sea metagenome
Source: Springer Nature journal article supplement (doi:10.1186/gb-2008-9-1-r5), 2008-01-07

**SuppFig 2: Supertree of 18S rRNA, Consensus of 423000 trees.**

Numbers on branches give percent of topologies supporting a branch.

SSD : Sargasso Sea Database scaffold.

S6 : paired read from sample 6 (see Method).

\*SSD : SSD scaffold for which topology enables to assign taxonomic affiliation

(branch supported by 80% of topologies)

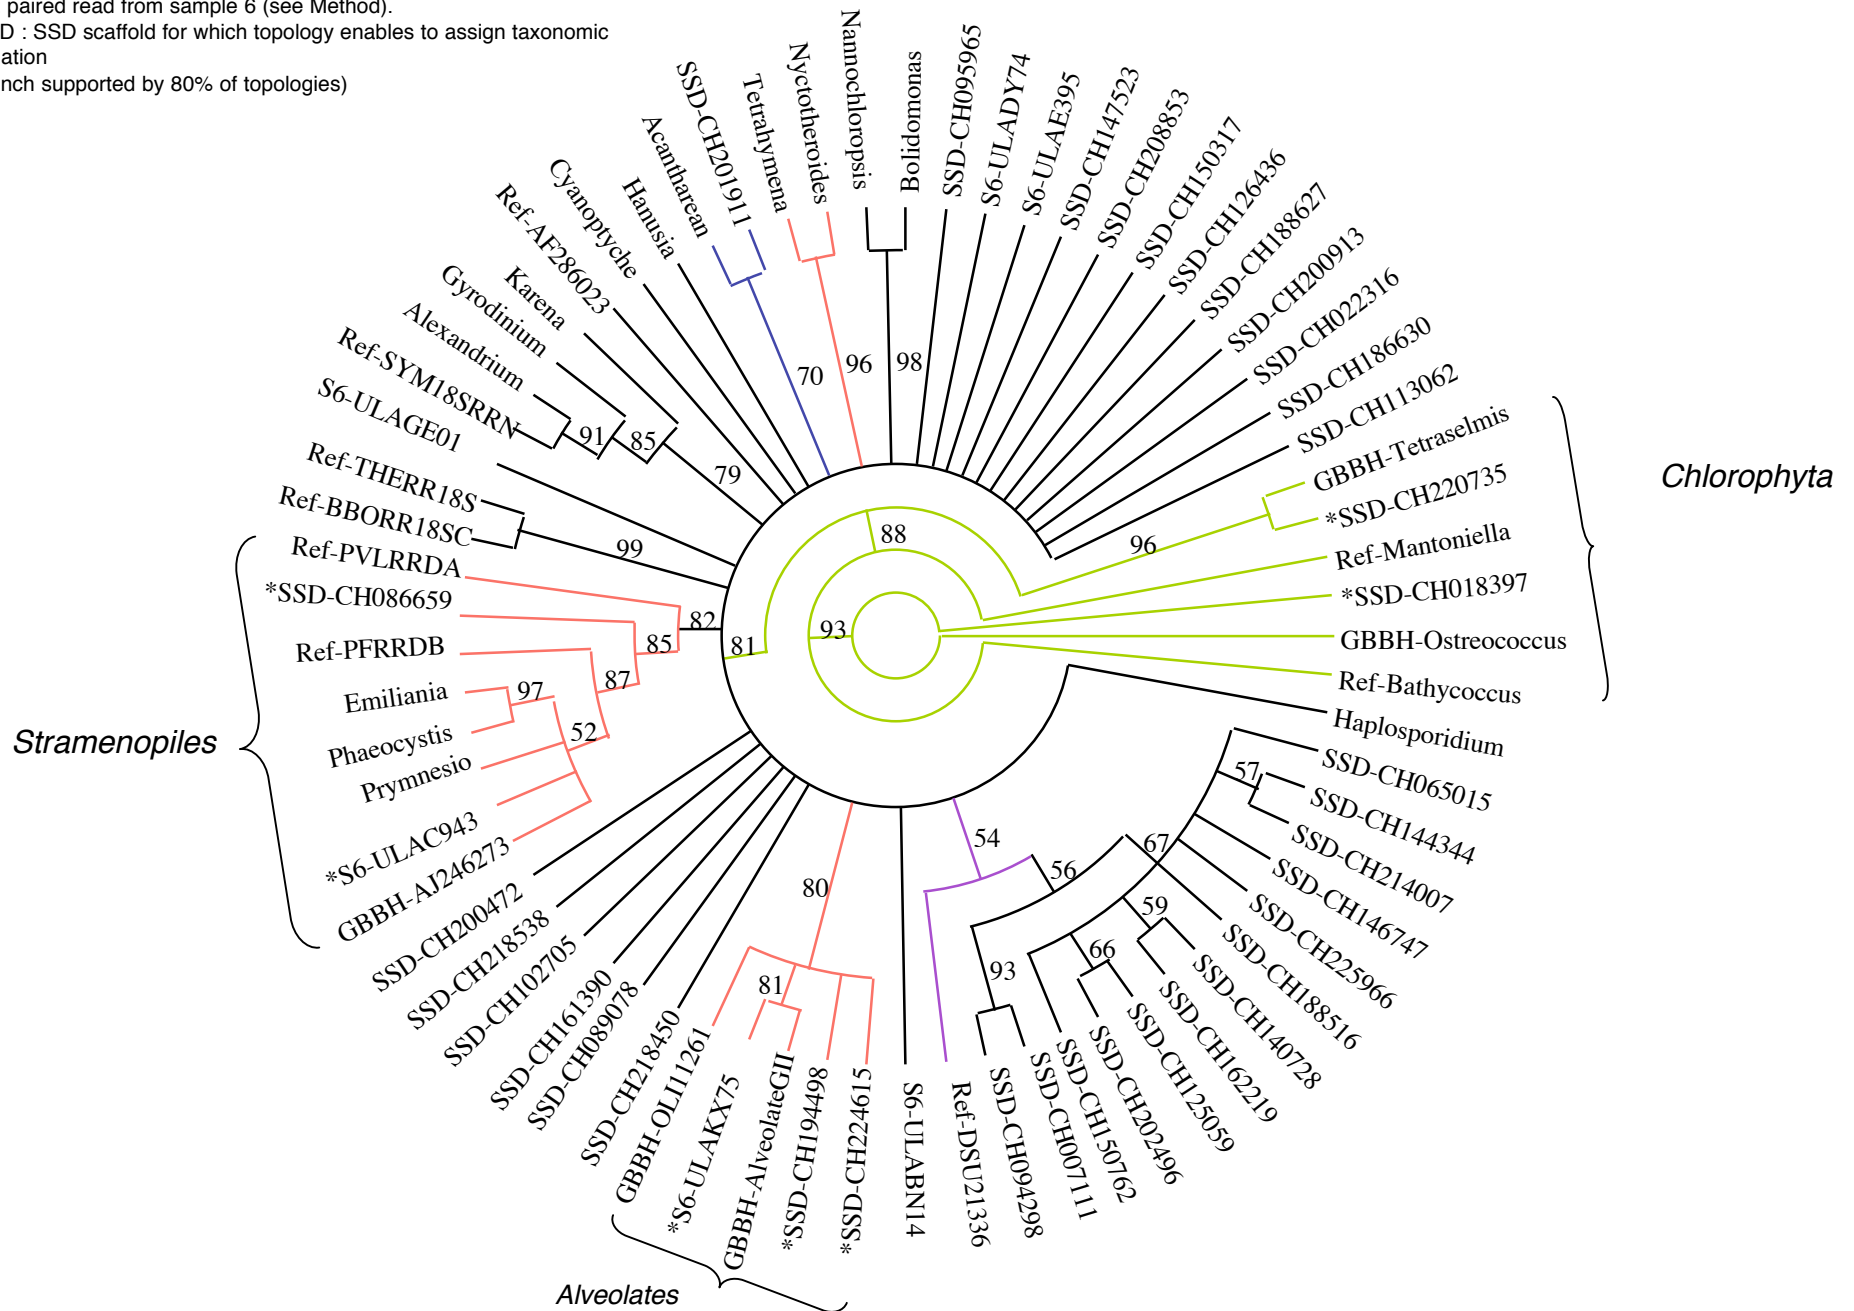

Supplement: Additional file 2 [file gb-2008-9-1-r5-s2.pdf]
